# Supplementary material
Source: publisher figshare collection journal article supplement (https://gsapubs.figshare.com/ndownloader/files/34965765)
Supplement: Supplementary file 1 [file 34965765]

## Supplementary Material

### Sn attenuation tomography beneath the Anatolian-Iranian Plateau and Zagros Mountain Belt

Ayoub Kaviani<sup>1</sup>, Eric Sandvol<sup>2</sup>, Wenfei Ku<sup>2</sup>, Susan L. Beck<sup>3</sup>, Niyazi Türkelli<sup>4</sup>, A. Arda Özacar<sup>5</sup>, and Jonathan R. Delph<sup>6</sup>

<sup>1</sup>*Institute of Geosciences, Goethe University Frankfurt, 60323 Frankfurt, Germany*

<sup>2</sup>*Department of Geological Sciences, University of Missouri, Columbia, Missouri 65211, USA*

<sup>3</sup>*Department of Geosciences, University of Arizona, Tucson, Arizona 85721, USA*

<sup>4</sup>*Kandilli Observatory and Earthquake Research Institute, Department of Geophysics, Boğazici University, 34684 Istanbul, Turkey*

<sup>5</sup>*Department of Geological Engineering, Middle East Technical University, 06800 Ankara, Turkey*

<sup>6</sup>*Department of Earth, Atmospheric, and Planetary Sciences, Purdue University, West Lafayette, Indiana 47907, USA*

The supplementary material includes Figure S1.

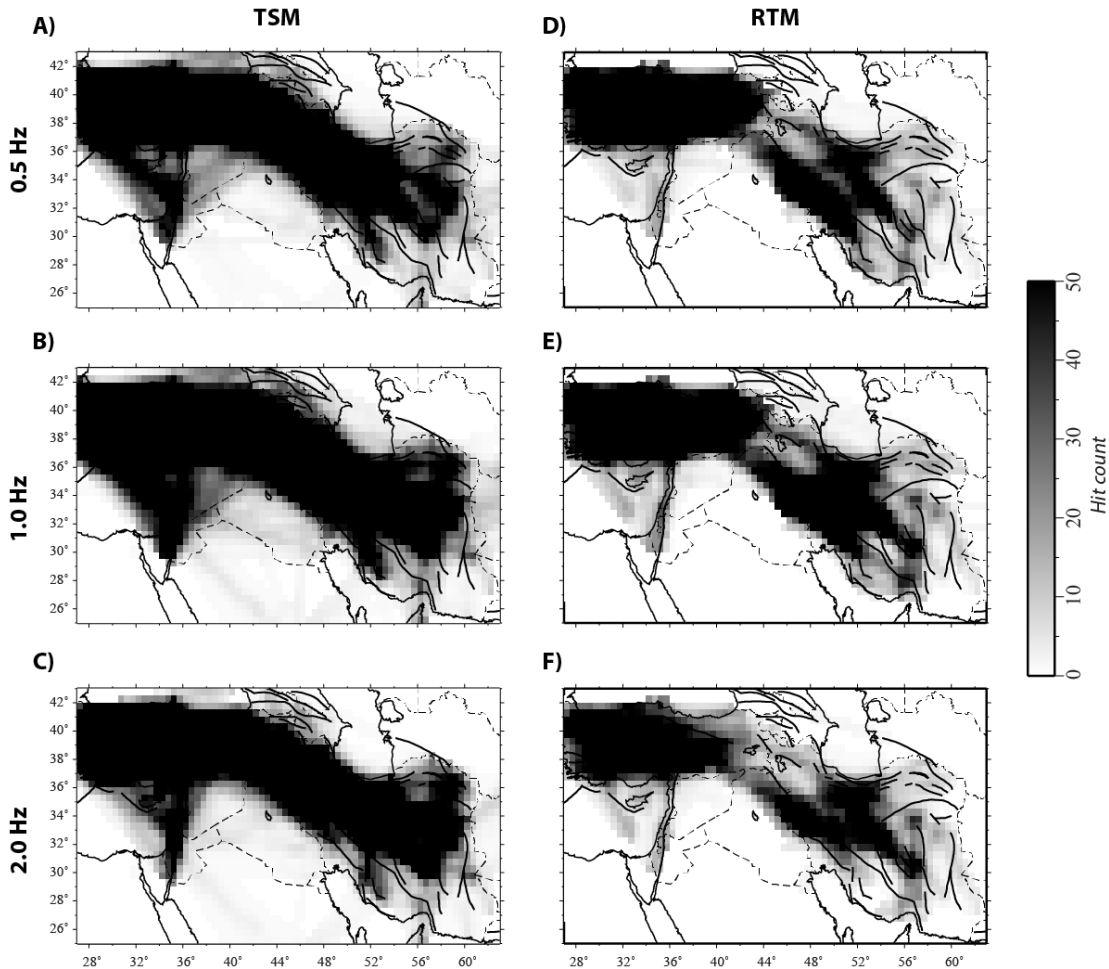

Figure S1. Maps showing ray coverage per model block. The darker the region, the higher is the hit count.
